# Supplementary material
Source: PubMed Central journal article supplement (PMC4492887)
Supplement: NIHMS703226-supplement-supplement_1.pdf [file NIHMS703226-supplement-supplement_1.pdf]

**Supplementary material****Intergenerational change in *Helicobacter pylori* colonization in children living in a multi-ethnic Western population**

Wouter J. den Hollander<sup>1,2</sup>, I. Lisanne Holster<sup>1</sup>, Bianca van Gilst<sup>1</sup>, Anneke J. van Vuuren<sup>1</sup>, Vincent W. Jaddoe<sup>2,4,5</sup>, Albert Hofman<sup>5</sup>, Guillermo I. Perez-Perez<sup>6</sup>, Ernst J. Kuipers<sup>1,3</sup>, Henriëtte A. Moll<sup>4</sup>, Martin J. Blaser<sup>6</sup>

Departments of <sup>1</sup>Gastroenterology and Hepatology, <sup>2</sup>The Generation R Study Group, <sup>3</sup>Internal Medicine, <sup>4</sup>Pediatrics, and <sup>5</sup>Epidemiology, Erasmus University Medical Centre, Rotterdam, The Netherlands; <sup>6</sup>Departments of Medicine and Microbiology, New York University Langone Medical Centre, New York, USA.

## TABLE TITLES AND FIGURE LEGENDS

Table S1. Comparison of the maternal and child characteristics for those included or not included in the study, among the 8,305 eligible subjects.

Table S2. Missing data analyses in 4,467 children.

Table S3. Multivariate analysis of determinants for CagA-positivity in 438 *H. pylori*-positive children.

Table S4. Multivariate analysis of determinants associated with female gender.

Table S5. Multivariate analysis of determinants associated with C-section.

Table S6. Multivariate analysis of *H. pylori* status by European vs. non-European ethnicity.

Table S7. Multivariate analysis of risk factors for *H. pylori* loss in 1,328 children with an *H. pylori*-positive mother.

Figure S1. *H. pylori* antibody distribution in mothers and children. Distribution of levels (ODR) of mothers (A) and children (B). The numbers above the bars reflect the percent within the total population.

Figure S2. Continuing acquisition of *H. pylori* by age. *H. pylori* positivity rates (%) in 2,516 children of Dutch and 1,951 children non-Dutch ethnicity at ages 5, 6, and 7. The p-value for trend is <0.05 in both groups.

Figure S3. Comparison of *H. pylori* and CagA status in 3,185 mothers and their children. The 3,185 children are grouped by *H. pylori* and CagA status. Each figure shows the percent (%) of children with an *H. pylori*-negative ( $Hp^-$ ), CagA<sup>-</sup> ( $Hp^+CagA^-$ ), or CagA<sup>+</sup> ( $Hp^+CagA^+$ ) mother. \*p < 0.05 by Chi-square test. The p-values reflect the difference between the corresponding *H. pylori* status of mother and child, and the two other groups.

**Table S1. Comparison of the maternal and child characteristics between those included and those not included in the study among the 8,305 eligible subjects.**

|                                          | Population<br>without <i>H. pylori</i><br>data<br>N=3,338 (40.2) | Population<br>with <i>H. pylori</i><br>data<br>N=4,467 (59.8) | p-value |
|------------------------------------------|------------------------------------------------------------------|---------------------------------------------------------------|---------|
| <i>Child characteristics</i>             |                                                                  |                                                               |         |
| Age                                      | 6.1 (0.5)                                                        | 6.2 (0.6)                                                     | <0.01   |
| Female sex                               | 1,948 (50.8)                                                     | 2,164 (48.4)                                                  | 0.04    |
| Gestational age at birth                 | 39.7 (1.9)                                                       | 39.8 (1.8)                                                    | 0.06    |
| Birth weight                             | 3,383 (586)                                                      | 3,413 (569)                                                   | 0.26    |
| Ethnicity                                |                                                                  |                                                               |         |
| Dutch                                    | 1,999 (55.2)                                                     | 2,505 (57.6)                                                  | 0.02    |
| Surinamese                               | 287 (7.9)                                                        | 317 (7.3)                                                     |         |
| Turkish                                  | 309 (8.5)                                                        | 311 (7.2)                                                     |         |
| Moroccan                                 | 241 (6.7)                                                        | 256 (5.9)                                                     |         |
| Dutch Antilles                           | 118 (3.3)                                                        | 141 (3.2)                                                     |         |
| Cape Verdean                             | 99 (2.7)                                                         | 129 (3.0)                                                     |         |
| Other                                    | 630 (17.4)                                                       | 690 (15.9)                                                    |         |
| Caesarean section                        | 441 (13.1)                                                       | 496 (12.9)                                                    | 0.74    |
| Breastfeeding                            | 2,448 (90.9)                                                     | 3,248 (92.5)                                                  | 0.03    |
| Day-care attendance 1 <sup>st</sup> year | 1,043 (57.2)                                                     | 1,548 (60.3)                                                  | 0.04    |
| <i>Maternal characteristics</i>          |                                                                  |                                                               |         |
| Parity                                   |                                                                  |                                                               |         |
| Nulliparous                              | 2,077 (55.9)                                                     | 2,370 (55.0)                                                  | 0.45    |
| Multipara                                | 1,640 (44.1)                                                     | 1,936 (45.0)                                                  |         |
| Maternal education                       |                                                                  |                                                               |         |
| Low/medium                               | 1,989 (58.3)                                                     | 2,101 (51.8)                                                  | <0.01   |
| High                                     | 1,420 (41.7)                                                     | 1,955 (48.2)                                                  |         |

Values shown are absolute numbers (and percentages) for categorical variables, except that age, gestational age at birth, and birth weight are reported as the mean (and standard deviation).

Table S2. Missing data analyses in 4,467 children.

|                                              | Population with incomplete data on covariates*<br>N= 3,039 (68.0) | Population with complete data on covariates<br>N= 1,428 (32.0) | P-value | Missing (%) <sup>a</sup> |
|----------------------------------------------|-------------------------------------------------------------------|----------------------------------------------------------------|---------|--------------------------|
| <i>Child characteristics</i>                 |                                                                   |                                                                |         |                          |
| Age (SD)                                     | 6.36 (0.54)                                                       | 6.03 (0.35)                                                    | <0.001  | 0                        |
| Female sex (%)                               | 1,469 (48.3)                                                      | 695 (48.7)                                                     | 0.84    | 0                        |
| Gestational age at birth (SD)                | 39.6 (1.9)                                                        | 40.0 (1.7)                                                     | <0.001  | 0.7                      |
| Birth weight (SD)                            |                                                                   |                                                                |         | 0.2                      |
| Ethnicity (%)                                |                                                                   |                                                                | <0.001  | 2.6                      |
| Dutch                                        | 1,509 (51.7)                                                      | 996 (69.7)                                                     |         |                          |
| Surinamese                                   | 247 (8.5)                                                         | 70 (4.9)                                                       |         |                          |
| Turkish                                      | 250 (8.6)                                                         | 61 (4.3)                                                       |         |                          |
| Moroccan                                     | 222 (7.6)                                                         | 34 (2.4)                                                       |         |                          |
| Dutch Antilles                               | 118 (4.0)                                                         | 23 (1.6)                                                       |         |                          |
| Cape Verdean                                 | 108 (3.7)                                                         | 21 (1.5)                                                       |         |                          |
| Other                                        | 467 (16.0)                                                        | 223 (15.6)                                                     |         |                          |
| Caesarean section (%)                        | 299 (12.3)                                                        | 197 (13.8)                                                     | 0.19    | 13.7                     |
| Breastfeeding (%)                            | 1,917 (92.0)                                                      | 1,331 (93.2)                                                   | 0.18    | 21.4                     |
| Day-care attendance 1 <sup>st</sup> year (%) | 637 (55.9)                                                        | 911 (63.8)                                                     | <0.001  | 42.5                     |
| <i>Maternal characteristics</i>              |                                                                   |                                                                |         |                          |
| Parity (%)                                   |                                                                   |                                                                | <0.001  | 3.6                      |
| Nulliparous                                  | 889 (51.2)                                                        | 866 (60.6)                                                     |         |                          |
| Multiparous                                  | 846 (48.8)                                                        | 562 (39.4)                                                     |         |                          |
| Maternal education (%)                       |                                                                   |                                                                | <0.001  | 9.2                      |
| Low/medium                                   | 1,562 (59.4)                                                      | 539 (37.7)                                                     |         |                          |
| High                                         | 1,066 (40.6)                                                      | 889 (62.3)                                                     |         |                          |

\*Data on  $\geq 1$  covariate is missing. <sup>a</sup>Percentage of missings per category.

Values shown are absolute numbers (and percentages) for categorical variables. Gestational age at birth and birth weight are reported as the mean (and standard deviation).

**Table S3. Multivariate analysis of determinants for CagA-positivity in 438 *H. pylori*-positive children<sup>a</sup>.**

|                                                    |                   |
|----------------------------------------------------|-------------------|
| <b>Age<sup>b</sup></b>                             | 0.93 (0.51-1.71)  |
| <b>Gender</b>                                      |                   |
| Female                                             | 0.87 (0.56-1.35)  |
| Male                                               | <i>Reference</i>  |
| <b>Ethnicity</b>                                   |                   |
| Dutch                                              | <i>Reference</i>  |
| Non-Dutch                                          | 2.48 (1.27-4.85)* |
| <b>Breastfeeding<sup>c</sup></b>                   |                   |
| Never                                              | <i>Reference</i>  |
| Partial                                            | 0.84 (0.31-2.25)  |
| Exclusive                                          | 0.60 (0.20-1.87)  |
| <b>Educational level</b>                           |                   |
| Primary/secondary                                  | 2.65 (1.33-5.28)* |
| Higher                                             | <i>Reference</i>  |
| <b>Number of older siblings</b>                    |                   |
| 0                                                  | <i>Reference</i>  |
| ≥1                                                 | 1.02 (0.66-1.60)  |
| <b>Day-care attendance<sup>d</sup></b>             |                   |
| No                                                 | <i>Reference</i>  |
| Yes                                                | 0.62 (0.35-1.12)  |
| <b>Caesarian section</b>                           |                   |
| No                                                 | <i>Reference</i>  |
| Yes                                                | 1.66 (0.72-3.81)  |
| <b>Cumulative antibiotics exposure<sup>e</sup></b> |                   |
| 0 courses                                          | <i>Reference</i>  |
| 1-2 courses                                        | 0.76 (0.34-1.73)  |

1  
2  
3  
4  
5  
6  
7  
8  
9  
10  
11  
12  
13  
14  
15  
16  
17  
18  
19  
20  
21  
22  
23  
24  
25  
26  
27  
28  
29  
30  
31  
32  
33  
34  
35  
36  
37  
38  
39  
40  
41  
42  
43  
44  
45  
46  
47  
48  
49  
50  
51  
52  
53  
54  
55  
56  
57  
58  
59  
60

≥3 courses 0.76 (0.35-1.67)

---

<sup>a</sup>Multivariate logistic regression analysis comparing 142 CagA<sup>+</sup> with 296 CagA<sup>-</sup>-children. Numbers are displayed as odds ratio (95% confidence interval) and represent the association with CagA<sup>+</sup>-children. All listed variables were entered into the multivariate analysis.

<sup>b</sup>for each additional year

<sup>c</sup>Data pertain to the first 4 months of life

<sup>d</sup>Data pertain to the first year of life

<sup>e</sup>Cumulative antibiotic exposure data combined until the age of 72 months.

\* p < 0.05

Confidential: For Review Only

Table S4. Multivariate analysis of determinants associated with female gender<sup>a</sup>.

|                                                   |                   |
|---------------------------------------------------|-------------------|
| <b>Age<sup>b</sup></b>                            | 0.94 (0.82-1.07)  |
| <b>Ethnicity</b>                                  |                   |
| Dutch                                             | <i>Reference</i>  |
| Non-Dutch                                         | 1.04 (0.91-1.18)  |
| <b>Breastfeeding<sup>c</sup></b>                  |                   |
| Never                                             | <i>Reference</i>  |
| Partial                                           | 1.00 (0.75-1.34)  |
| Exclusive                                         | 1.03 (0.78-1.35)  |
| <b>Educational level</b>                          |                   |
| Primary/secondary                                 | 1.17 (1.01-1.35)* |
| Higher                                            | <i>Reference</i>  |
| <b>Number of older siblings</b>                   |                   |
| 0                                                 | <i>Reference</i>  |
| ≥1                                                | 0.90 (0.79-1.01)  |
| <b>Day-care attendance<sup>d</sup></b>            |                   |
| No                                                | <i>Reference</i>  |
| Yes                                               | 1.09 (0.92-1.29)  |
| <b>Caesarian section</b>                          |                   |
| No                                                | <i>Reference</i>  |
| Yes                                               | 0.89 (0.73-1.08)  |
| <b>Cumulative antibiotic exposure<sup>e</sup></b> |                   |
| 0                                                 | 1.30 (1.07-1.60)* |
| 1-2 courses                                       | 1.06 (0.89-1.25)  |
| ≥3 courses                                        | <i>Reference</i>  |

<sup>a</sup>Multivariate logistic regression analysis comparing 2,164 females with 2,303 males. Numbers are displayed as odds ratio (and 95% confidence interval) and represent the association with female gender. All listed variables were entered into the multivariate analysis.

<sup>b</sup>for each additional year

1  
2  
3  
4  
5  
6  
7  
8  
9  
10  
11  
12  
13  
14  
15  
16  
17  
18  
19  
20  
21  
22  
23  
24  
25  
26  
27  
28  
29  
30  
31  
32  
33  
34  
35  
36  
37  
38  
39  
40  
41  
42  
43  
44  
45  
46  
47  
48  
49  
50  
51  
52  
53  
54  
55  
56  
57  
58  
59  
60

<sup>c</sup>Data pertain to the first 4 months of life  
<sup>d</sup>Data pertain to the first year of life  
<sup>e</sup>Cumulative antibiotic exposure data combined until the age of 72 months.  
\* p < 0.05

Confidential: For Review Only



**Table S5 Multivariate analysis of determinants associated with Ceasarian section<sup>a</sup>.**

|                                                   |                   |
|---------------------------------------------------|-------------------|
| <b>Age<sup>b</sup></b>                            | 1.01 (0.81-1.27)  |
| <b>Ethnicity (%)</b>                              |                   |
| Dutch                                             | <i>Reference</i>  |
| Non-Dutch                                         | 0.98 (0.79-1.21)  |
| <b>Breastfeeding<sup>c</sup></b>                  |                   |
| Never                                             | 1.98 (1.31-2.98)* |
| Partial                                           | 1.30 (0.95-1.78)  |
| Exclusive                                         | <i>Reference</i>  |
| <b>Educational level</b>                          |                   |
| Primary/secondary                                 | 0.98 (0.69-1.30)  |
| Higher                                            | <i>Reference</i>  |
| <b>Number of older siblings</b>                   |                   |
| 0                                                 | 1.81 (1.48-2.20)* |
| ≥1                                                | <i>Reference</i>  |
| <b>Day-care attendance<sup>d</sup></b>            |                   |
| No                                                | <i>Reference</i>  |
| Yes                                               | 1.34 (1.01-1.77)* |
| <b>Cumulative antibiotic exposure<sup>e</sup></b> |                   |
| 0                                                 | <i>Reference</i>  |
| 1-2 courses                                       | 0.95 (0.69-1.30)  |
| ≥3 courses                                        | 1.00 (0.76-1.31)  |

<sup>a</sup>Multivariate logistic regression analysis comparing Ceasarian section (n=589) with vaginal births (n=3,878). Numbers are displayed as odds ratio (95% confidence interval) and represent association with Ceasarian section. All listed variables were entered into the multivariate analysis.

<sup>b</sup>for each additional year

<sup>c</sup>Data pertain to the first 4 months of life

<sup>d</sup>Data pertain to the first year of life

<sup>e</sup>Cumulative antibiotic exposure data combined until the age of 72 months.

\* p < 0.05

Table S6. Multivariate analysis of *H. pylori* status by ethnicity (European vs. non-European)<sup>a</sup>.

|                                              | European          | Non-European      |
|----------------------------------------------|-------------------|-------------------|
| <b>Age<sup>b</sup></b>                       | 1.55 (1.07-2.24)* | 1.09 (0.82-1.44)  |
| <b>Gender</b>                                |                   |                   |
| Female                                       | 1.50 (1.10-2.06)* | 1.46 (1.12-1.92)* |
| Male                                         | <i>Reference</i>  | <i>Reference</i>  |
| <b>Breastfeeding<sup>c</sup></b>             |                   |                   |
| Never                                        | <i>Reference</i>  | <i>Reference</i>  |
| Partial                                      | 1.10 (0.58-2.12)  | 1.33 (0.57-3.11)  |
| Exclusive                                    | 1.08 (0.51-2.27)  | 1.45 (0.64-3.29)  |
| <b>Educational level</b>                     |                   |                   |
| Primary/secondary                            | 1.10 (0.76-1.60)  | 1.74 (1.13-2.69)* |
| Higher                                       | <i>Reference</i>  | <i>Reference</i>  |
| <b>Number of older siblings</b>              |                   |                   |
| 0                                            | <i>Reference</i>  | <i>Reference</i>  |
| ≥1                                           | 1.13 (0.81-1.56)  | 1.16 (0.87-1.54)  |
| <b>Day-care attendance<sup>d</sup></b>       |                   |                   |
| No                                           | <i>Reference</i>  | <i>Reference</i>  |
| Yes                                          | 1.22 (0.71-2.08)  | 0.77 (0.52-1.14)  |
| <b>Caesarean section</b>                     |                   |                   |
| No                                           | <i>Reference</i>  | <i>Reference</i>  |
| Yes                                          | 0.90 (0.53-1.53)  | 0.69 (0.39-1.22)  |
| <b>Cumulative antibiotic use<sup>e</sup></b> |                   |                   |
| 0                                            | <i>Reference</i>  | <i>Reference</i>  |
| 1-2 courses                                  | 1.24 (0.77-1.99)  | 0.92 (0.56-1.50)  |
| ≥3 courses                                   | 1.20 (0.74-1.93)  | 0.91 (0.56-1.48)  |

**Maternal *H. pylori* status**

| <i>Hp</i> -      | <i>Reference</i>  | <i>Reference</i>  |
|------------------|-------------------|-------------------|
| <i>Hp</i> +CagA- | 2.16 (1.42-3.27)* | 1.99 (1.31-3.04)* |
| <i>Hp</i> +CagA+ | 3.75 (2.14-6.59)* | 1.95 (1.24-3.07)* |

Multivariate logistic regression analysis comparing 2,848 subjects of European with 1,619 subjects of non-European ethnic background. Numbers are displayed as odds ratio (and 95% confidence interval) and represent association with *H. pylori* positivity. All listed variables were entered into the multivariate analysis.

<sup>b</sup>for each additional year

<sup>c</sup>Data pertain to the first 4 months of life

<sup>d</sup>Data pertain to the first year of life

<sup>e</sup>Cumulative antibiotic exposure data combined until the age of 72 months.

\*  $p < 0.05$

**Table S7. Multivariate analysis of risk factors for *H. pylori* loss in 1,328 children with an *H. pylori*-positive mother<sup>a</sup>.**

|                                                    |                   |
|----------------------------------------------------|-------------------|
| <b>Gender</b>                                      |                   |
| Female                                             | <i>Reference</i>  |
| Male                                               | 1.64 (1.21-2.23)* |
| <b>Breastfeeding<sup>b</sup></b>                   |                   |
| Never                                              | 1.38 (0.55-3.48)  |
| Partial                                            | 1.10 (0.65-1.84)  |
| Exclusive                                          | <i>Reference</i>  |
| <b>Educational level</b>                           |                   |
| Primary/secondary                                  | <i>Reference</i>  |
| Higher                                             | 1.78 (1.15-2.76)* |
| <b>Number of older siblings</b>                    |                   |
| 0                                                  | 1.37 (1.01-1.88)* |
| ≥1                                                 | <i>Reference</i>  |
| <b>Day-care attendance<sup>c</sup></b>             |                   |
| No                                                 | <i>Reference</i>  |
| Yes                                                | 1.30 (0.81-2.09)  |
| <b>Caesarian section</b>                           |                   |
| No                                                 | <i>Reference</i>  |
| Yes                                                | 1.58 (0.74-3.39)  |
| <b>Cumulative antibiotic exposures<sup>d</sup></b> |                   |
| 0                                                  | <i>Reference</i>  |
| 1-2 courses                                        | 1.08 (0.56-2.06)  |
| ≥3 courses                                         | 1.03 (0.58-1.83)  |

<sup>a</sup>Multivariate logistic regression analysis comparing 1,117 *H. pylori*-negative children with 211 *H. pylori*-positive children. Numbers are displayed as odds ratio (and 95% confidence interval) and represent

1  
2  
3 association with *H. pylori*-negative children (loss of *H. pylori*). All listed variables were entered into the  
4 multivariate analysis.  
5

6 <sup>b</sup>Data pertain to the first 4 months of life

7 <sup>c</sup>Data pertain to the first year of life

8 <sup>d</sup>Cumulative antibiotic exposure data combined until the age of 72 months.

9  
10  
11 \*  $p < 0.05$   
12  
13  
14  
15  
16  
17  
18  
19  
20  
21  
22  
23  
24  
25  
26  
27  
28  
29  
30  
31  
32  
33  
34  
35  
36  
37  
38  
39  
40  
41  
42  
43  
44  
45  
46  
47  
48  
49  
50  
51  
52  
53  
54  
55  
56  
57  
58  
59  
60

Figure S1

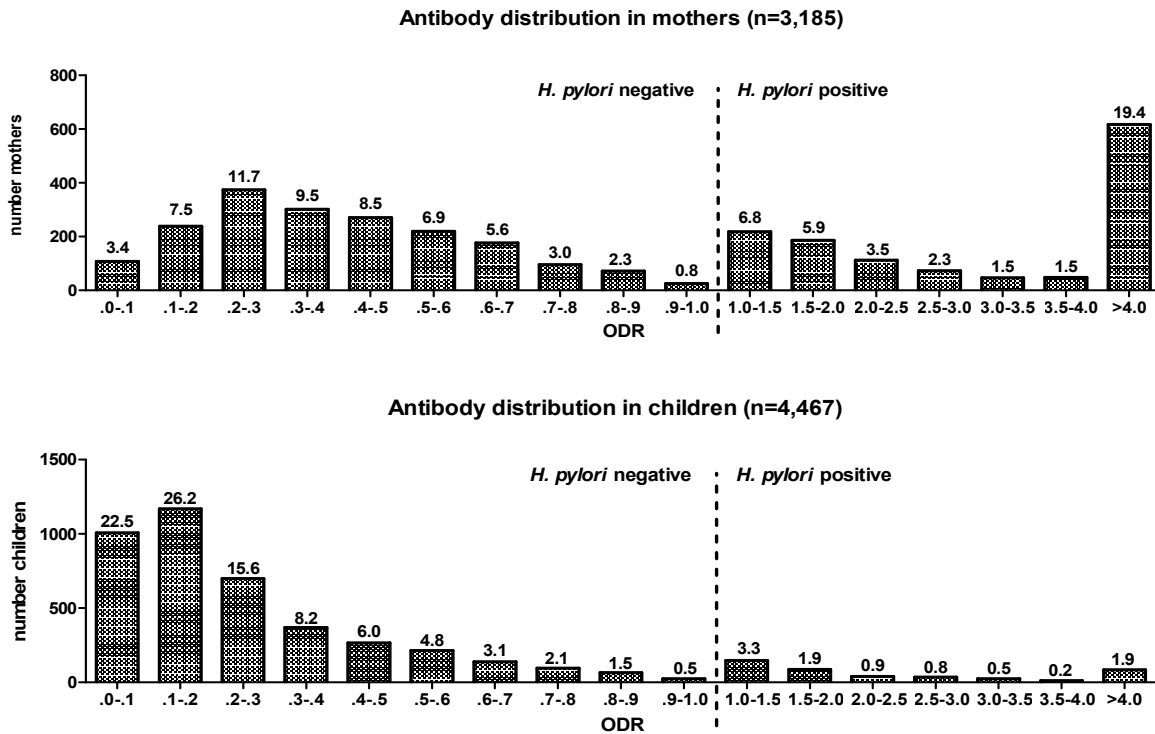

Pre-Review Only

Figure S2

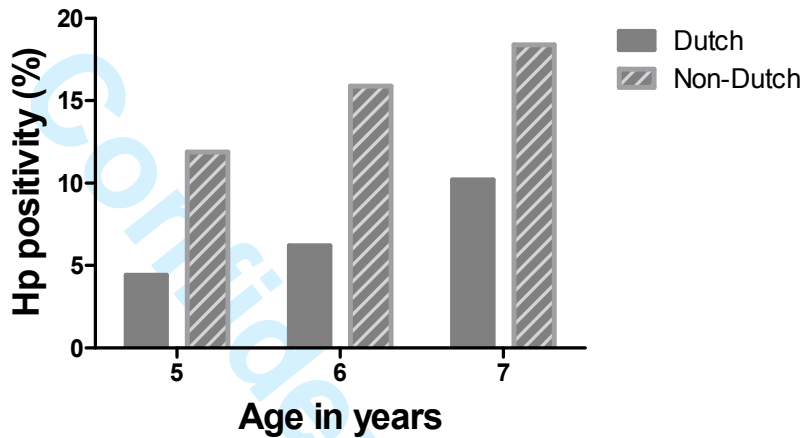

1  
2  
3  
4  
5  
6  
7  
8  
9  
10  
11  
12  
13  
14  
15  
16  
17  
18  
19  
20  
21  
22  
23  
24  
25  
26  
27  
28  
29  
30  
31  
32  
33  
34  
35  
36  
37  
38  
39  
40  
41  
42  
43  
44  
45  
46  
47  
48  
49  
50  
51  
52  
53  
54  
55  
56  
57  
58  
59  
60

Figure S3

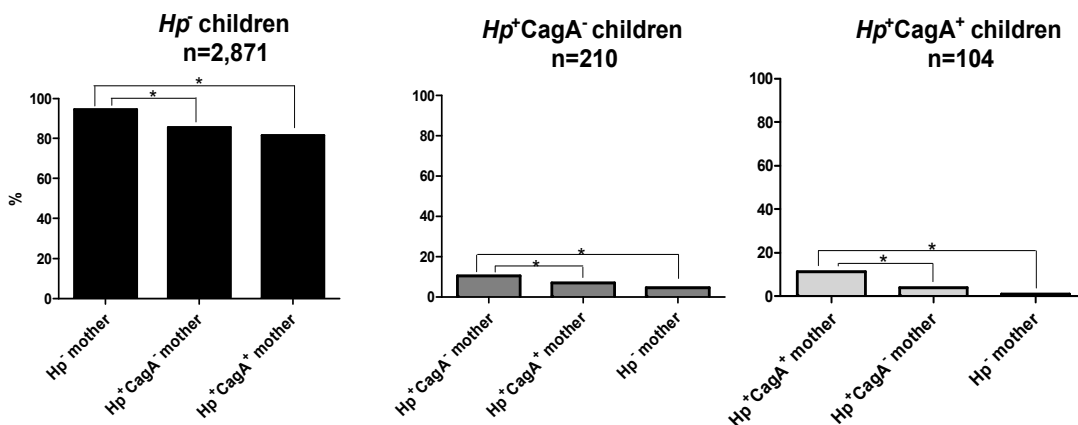

Initial: For Review Only
